# Supplementary material
Source: Research Square preprint supplement (doi:10.21203/rs.3.rs-10101351/v1)
Supplement: Supplementary file 1 [file 158e27f933ea6ff4b74dcb05.pdf]

Supplementary Information  
A confidence-convergence decision layer for  
reliability-aware sequential recognition under limited  
observations

G. L.

**Supplementary tables**

Supplementary Table S1: Simulation dataset and scenario settings

| Item               | Setting                                  | Description                                                    |
|--------------------|------------------------------------------|----------------------------------------------------------------|
| Behavior types     | $K = 3$                                  | Stable, search-like, and intermittent correction behaviours    |
| Episodes per trial | $N_{\text{ep}} = 900$                    | Class-balanced, 300 episodes per behavior type                 |
| Complete horizon   | $T = 100$                                | Full observation length of each episode                        |
| Window ratio       | $\gamma = 0.2\text{--}1.0$               | Limited-observation settings                                   |
| Feature dimension  | $M = 6$                                  | Motion, stage, and observation-quality indicators              |
| Noise level        | $\sigma_o \in \{0.03, 0.06, 0.10\}$      | Low, medium, and high observation noise                        |
| Missing ratio      | $r_m \in \{0, 0.1, 0.2, 0.3\}$           | Random missing observations                                    |
| Maximum delay      | $\delta_{\text{max}} \in \{0, 1, 2, 3\}$ | Bounded measurement delay                                      |
| Dataset split      | 60% / 20% / 20%                          | 540 training, 180 validation, and 180 test episodes per trial  |
| Random trials      | $N_{\text{trial}} = 30$                  | Repeated runs with independent initial states and disturbances |

Supplementary Table S2: Simulation assumptions and parameter roles

| Component            | Setting                                                                                   | Role in the simulation                                                     |
|----------------------|-------------------------------------------------------------------------------------------|----------------------------------------------------------------------------|
| Behavior abstraction | Stable, search-like, intermittent correction                                              | Produces separable but partially overlapping motion-evolution patterns     |
| State disturbance    | Zero-mean process disturbance in position, speed, heading, acceleration, and heading rate | Represents unmodelled manoeuvre variation within each behavior class       |
| Observation noise    | Gaussian noise in the main protocol; Laplace and mixed-outlier noise in sensitivity tests | Controls feature uncertainty and tests sensitivity to distributional shape |
| Missing observations | Independent feature mask with $r_m \in \{0, 0.1, 0.2, 0.3\}$                              | Represents intermittent loss of feature measurements or sensor reports     |
| Measurement delay    | Bounded delay with $\delta_{\max} \in \{0, 1, 2, 3\}$ and safe normalization              | Represents delayed arrival of underwater sensing information               |
| Class priors         | Balanced priors in the main protocol; 0.6/0.3/0.1 in sensitivity tests                    | Tests whether non-convergence depends on balanced simulated classes        |
| Validation selection | Thresholds selected on validation splits within each trial                                | Separates parameter tuning from final test evaluation                      |

Supplementary Table S3: Baseline methods for comparison

| Method                       | Sequential update | Convergence criteria                 | Output                             |
|------------------------------|-------------------|--------------------------------------|------------------------------------|
| Static classifier            | No                | No                                   | Forced label                       |
| Bayesian without convergence | Yes               | No                                   | Forced label                       |
| Threshold-only recognition   | Yes               | Single confidence threshold          | Label or continue                  |
| Selective posterior          | Yes               | Validation-selected reject threshold | Label or abstention                |
| Calibrated selective         | Yes               | Calibrated reject threshold          | Label or abstention                |
| Early-exit GRU               | Yes               | Calibrated early-exit threshold      | Label or abstention                |
| HMM-based recognition        | Yes               | No                                   | Forced label                       |
| GRU-based recognition        | Yes               | No                                   | Forced label                       |
| Proposed method              | Yes               | Dominance + stability + separation   | Label / continue / non-convergence |

Supplementary Table S4: Evaluation metrics

| Metric                       | Symbol         | Purpose                                                                        |
|------------------------------|----------------|--------------------------------------------------------------------------------|
| Accepted-decision accuracy   | $A_{lw}$       | Accuracy among accepted recognition decisions                                  |
| All-episode accuracy         | $A_{all}$      | Accuracy over all test episodes, including non-convergence or abstention cases |
| Mean decision time           | $T_{dec}$      | Timeliness of accepted recognition                                             |
| Confidence convergence time  | $T_{conv}$     | Time at which all convergence criteria are first satisfied                     |
| Wrong accepted-decision rate | $R_{wad}$      | Incorrect labels among accepted outputs                                        |
| Non-convergence rate         | $R_{nc}$       | Frequency of insufficient-evidence outputs                                     |
| Coverage                     | $C$            | Proportion of test episodes with accepted output                               |
| Accepted-decision risk       | $100 - A_{lw}$ | Error risk among accepted outputs                                              |
| Expected calibration error   | ECE            | Calibration quality of accepted confidence outputs                             |
| Robustness degradation       | $\Delta Q$     | Performance change under uncertainty                                           |

Supplementary Table S5: Mean performance comparison under the standard limited-observation setting over 30 random trials

| Method                       | $A_{lw}$ (%) | $A_{all}$ (%) | $T_{dec}$ | $R_{wad}$ (%) | $R_{nc}$ (%) |
|------------------------------|--------------|---------------|-----------|---------------|--------------|
| Static classifier            | 75.8         | 75.8          | N/A       | 24.2          | N/A          |
| Bayesian without convergence | 79.0         | 79.0          | 40.0      | 21.0          | N/A          |
| Threshold-only               | 82.0         | 77.1          | 22.8      | 16.9          | 6.0          |
| Selective posterior          | 84.9         | 78.1          | 25.5      | 14.1          | 8.0          |
| Calibrated selective         | 86.7         | 79.8          | 27.0      | 12.3          | 8.0          |
| Early-exit GRU               | 87.9         | 81.1          | 30.7      | 11.1          | 7.8          |
| HMM                          | 81.5         | 81.5          | 40.0      | 18.5          | N/A          |
| GRU                          | 83.5         | 83.5          | 40.0      | 16.5          | N/A          |
| Proposed                     | 91.2         | 82.1          | 29.4      | 7.9           | 10.0         |

Supplementary Table S6: Mean performance of the proposed method under different observation-window ratios over 30 random trials

| Window ratio $\gamma$ | $T_w$ | $A_{lw}$ (%) | $T_{dec}$ | $R_{wad}$ (%) | $R_{nc}$ (%) |
|-----------------------|-------|--------------|-----------|---------------|--------------|
| 0.2                   | 20    | 85.0         | 16.5      | 9.3           | 38.0         |
| 0.4                   | 40    | 91.2         | 29.4      | 7.9           | 10.0         |
| 0.6                   | 60    | 93.0         | 38.7      | 6.6           | 5.0          |
| 0.8                   | 80    | 95.2         | 46.2      | 4.7           | 2.0          |
| 1.0                   | 100   | 96.1         | 50.8      | 3.9           | 1.0          |

Supplementary Table S7: Mean ablation results for confidence convergence criteria over 30 random trials

| Criterion combination  | $A_{lw}$ (%) | $T_{dec}$ | $R_{wad}$ (%) | $R_{nc}$ (%) | ECE   |
|------------------------|--------------|-----------|---------------|--------------|-------|
| Dominance only         | 82.0         | 22.8      | 16.9          | 6.0          | 0.086 |
| Dominance + stability  | 88.0         | 28.6      | 10.6          | 12.0         | 0.061 |
| Dominance + separation | 87.4         | 27.9      | 11.2          | 10.8         | 0.064 |
| Full criteria          | 91.2         | 29.4      | 7.9           | 10.0         | 0.044 |

Supplementary Table S8: Additional sensitivity tests under distribution shift and class imbalance

| Scenario                             | $A_{lw}$ (%) | $R_{wad}$ (%) | $R_{nc}$ (%) | Macro-F1 (%) |
|--------------------------------------|--------------|---------------|--------------|--------------|
| Gaussian reference                   | 91.2         | 7.9           | 10.0         | 88.7         |
| Laplace noise, matched variance      | 89.1         | 9.8           | 12.0         | 86.2         |
| Mixed Gaussian outliers, 5% impulses | 87.6         | 11.5          | 15.0         | 84.1         |
| Imbalanced priors, 0.6/0.3/0.1       | 88.9         | 9.6           | 11.8         | 85.4         |
